# Supplementary material for: Canonical Transient Receptor Potential (TRPC) 1 Acts as a Negative Regulator for Vanilloid TRPV6-mediated Ca2+ Influx
Source: PubMed Central journal article supplement — J Biol Chem. 2012 Aug 29;287(42):35612–20. doi: 10.1074/jbc.M112.400952 (PMC3471760; doi:10.1074/jbc.m112.400952), 2012-08-29

## Supplementary Information

### Supplementary Figure 1. Localization and currents of homo- and heteromeric TRPC1 and TRPC5 channels:

Time course of whole-cell voltage ramps (A) and current-voltage relationships (B) for TRPC1 and/or TRPC5 over-expressing HEK293 cells upon activation with 100 $\mu$ M Carbachol (Cch). (C) Time course of whole-cell current for TRPC1 overexpression upon treatment with thapsigargin (TG, 1 $\mu$ M). Intracellular  $[Ca^{2+}]_i$  of Fura-2 loaded cells overexpressing TRPC1 are compared with a mock-transfection and monitored upon a stimulation with (D) carbachol (Cch, 100 $\mu$ M) or (E) thapsigargin (TG, 1 $\mu$ M) and subsequent addition of 2mM  $Ca^{2+}$ . Localization of a representative CFP-TRPC5 expressing cell (F, left image) as well as one over-expressing YFP-TRPC1 (F, right image) as well as for a co-expression of CFP-TRPC5 (G, image 1) with YFP-TRPC1 (G, image 3), and their overlay (G, image 2).

Supplementary Figure 1

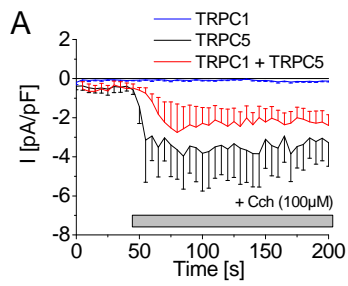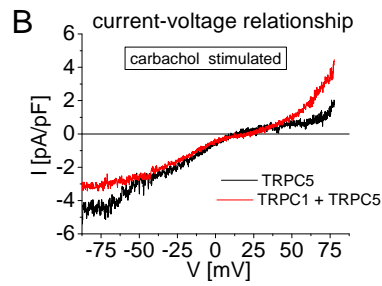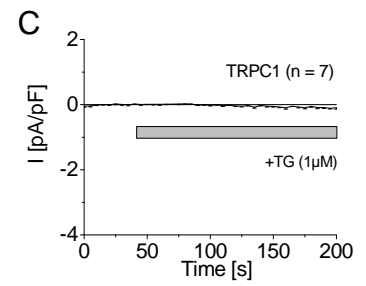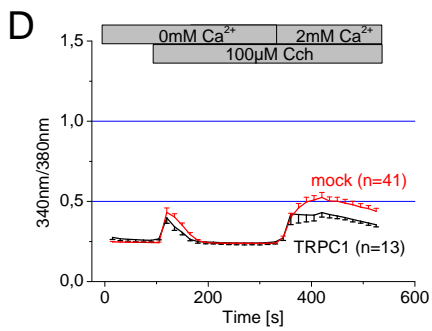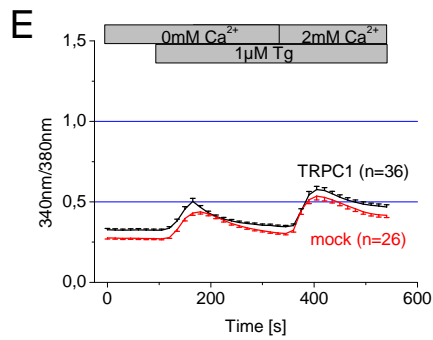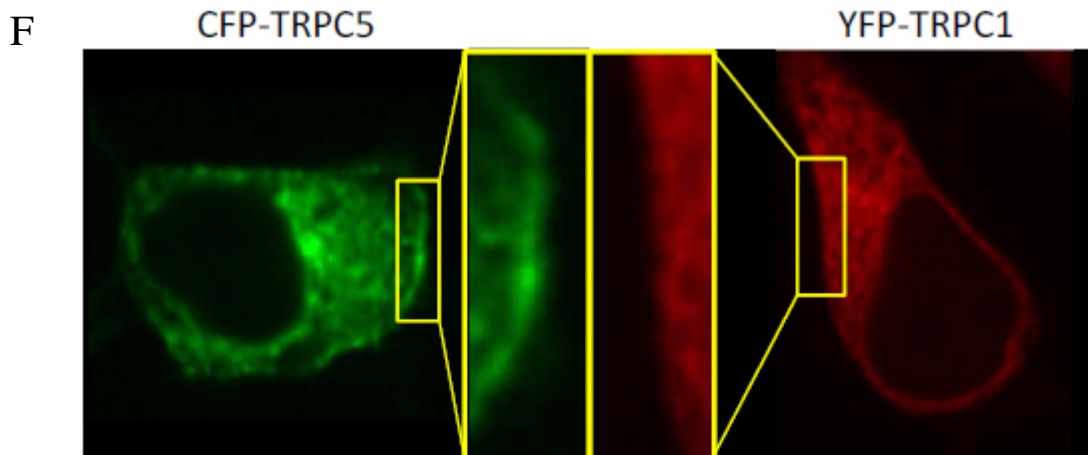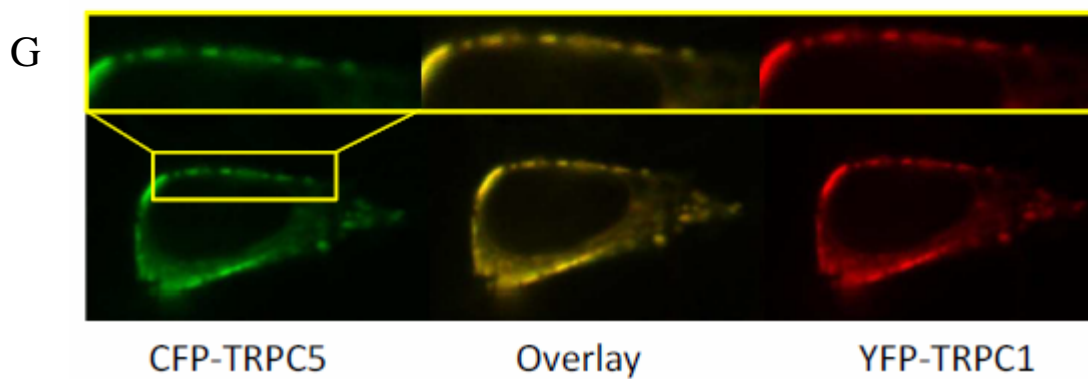

Supplement: supp_M112.400952_jbc.M112.400952-1.pdf [file supp_M112.400952_jbc.M112.400952-1.pdf]
